# Supplementary material for: Anticancer Activity of the Acetylenic Derivative of Betulin Phosphate Involves Induction of Necrotic-Like Death in Breast Cancer Cells In Vitro
Source: PubMed Central journal article supplement (PMC7865664; doi:10.3390/molecules26030615), 2021-01-25

## Supplementary materials

### **Anticancer activity of the acetylenic derivative of betulin phosphate involves induction of necrotic-like death in breast cancer cells *in vitro***

*Arkadiusz Orchel<sup>1\*</sup>, Ewa Chodurek<sup>1</sup>, Marzena Jaworska-Kik<sup>1</sup>, Piotr Paduszyński<sup>1</sup>, Anna Kaps<sup>1</sup>, Elwira Chrobak<sup>2</sup>, Ewa Bębenek<sup>2</sup>, Stanisław Boryczka<sup>2</sup>, Paulina Borkowska<sup>3</sup>, Janusz Kasperczyk<sup>1</sup>*

<sup>1</sup>Department of Biopharmacy, Faculty of Pharmaceutical Sciences in Sosnowiec, Medical University of Silesia, Katowice, Poland; aorchel@sum.edu.pl; echodurek@sum.edu.pl; jkik@sum.edu.pl; ppaduszynski@sum.edu.pl; akaps@sum.edu.pl; janusz.kasperczyk@sum.edu.pl

<sup>2</sup>Department of Organic Chemistry, Faculty of Pharmaceutical Sciences in Sosnowiec, Medical University of Silesia, Katowice, Poland; echrobak@sum.edu.pl; ebebenek@sum.edu.pl; boryczka@sum.edu.pl

<sup>3</sup> Department of Medical Genetics, Faculty of Pharmaceutical Sciences in Sosnowiec, Medical University of Silesia, Katowice, Poland; pborkowska@sum.edu.pl

\* Correspondence aorchel@sum.edu.pl; Tel.: 48 32 3641247

## LIST OF CONTENTS

Nuclear Magnetic Resonance spectra for compound **5** (**Fig. S1-S3**)

|                                                                       |          |
|-----------------------------------------------------------------------|----------|
| <b>Fig. S1.</b> $^1\text{H}$ NMR (600 MHz, $\text{CDCl}_3$ ).....     | <b>3</b> |
| <b>Fig. S2.</b> $^{13}\text{C}$ NMR (243 MHz, $\text{CDCl}_3$ ).....  | <b>3</b> |
| <b>Fig. S3.</b> $^{31}\text{P}$ NMR, (150 MHz, $\text{CDCl}_3$ )..... | <b>4</b> |
| <b>Fig. S4.</b> IR spectrum for compound <b>5</b> (KBr pellet).....   | <b>4</b> |
| <b>Fig. S5.</b> HR MS, compound <b>5</b> .....                        | <b>5</b> |

**Fig. S1.**  $^1\text{H}$  NMR (600 MHz,  $\text{CDCl}_3$ )

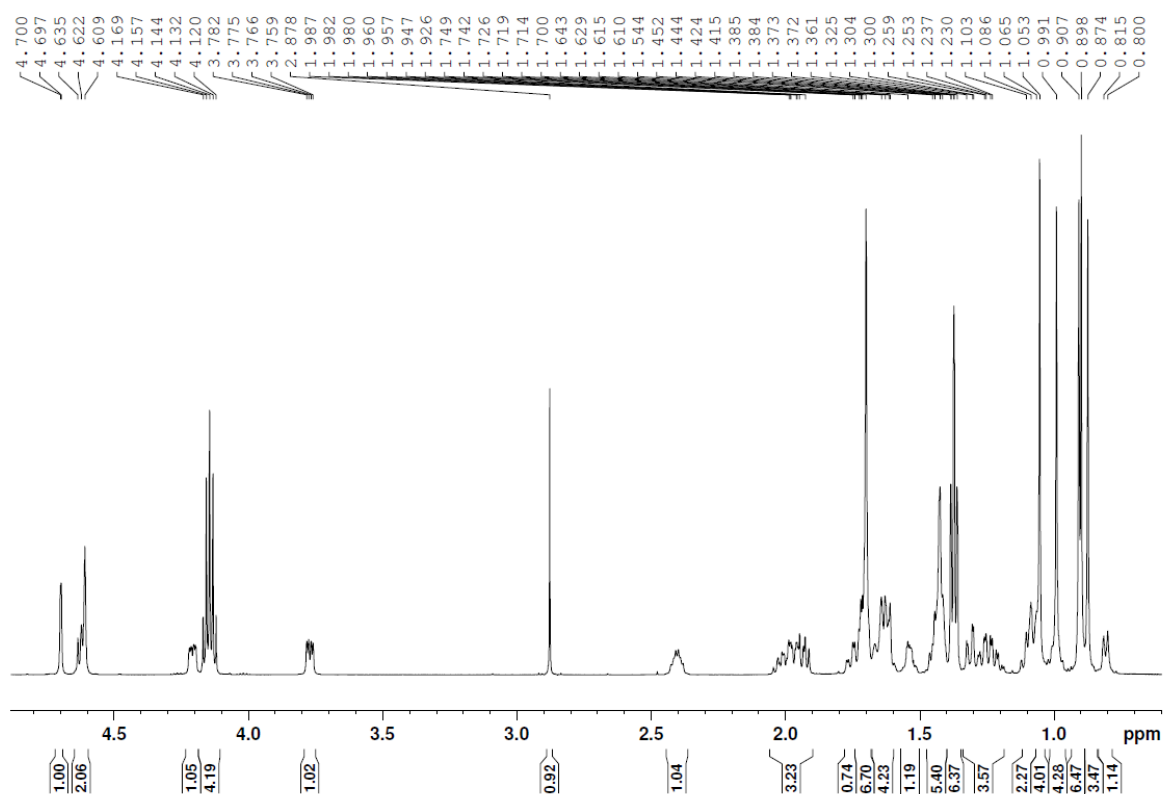

**Fig. S2.**  $^{13}\text{C}$  NMR (243 MHz,  $\text{CDCl}_3$ )

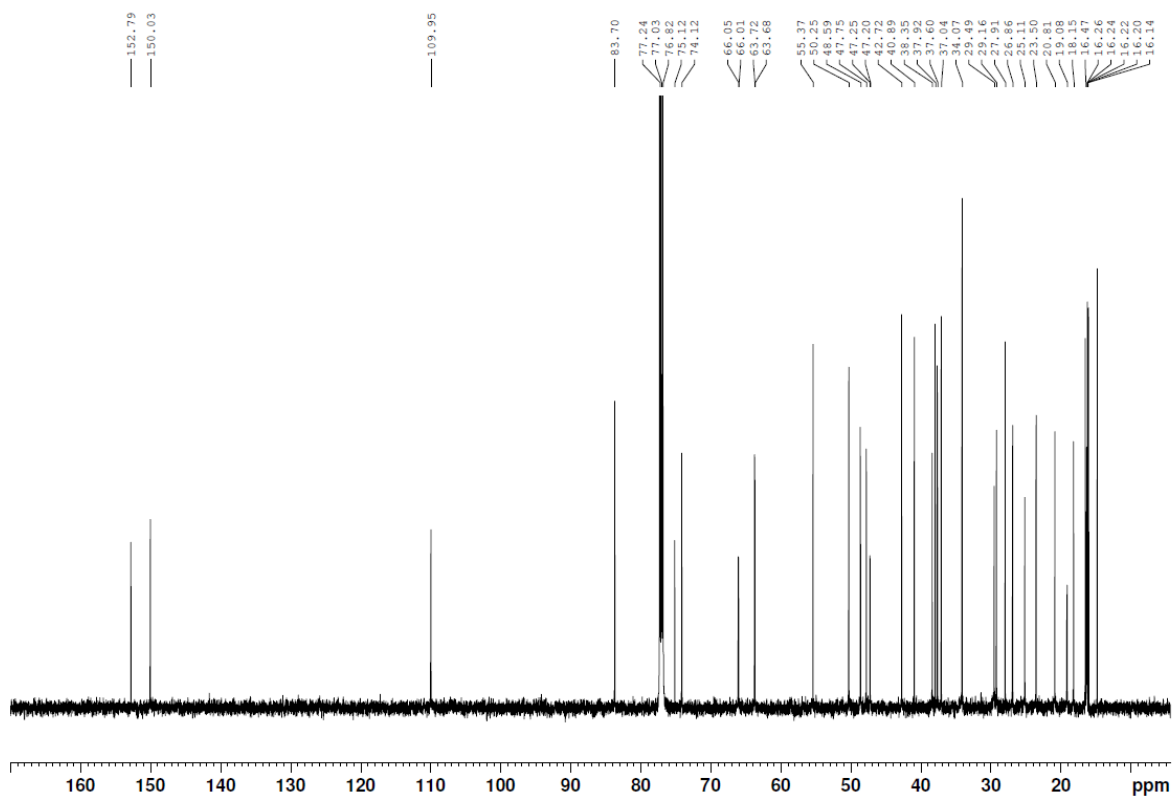

**Fig. S3.**  $^{31}\text{P}$  NMR, (150 MHz,  $\text{CDCl}_3$ )

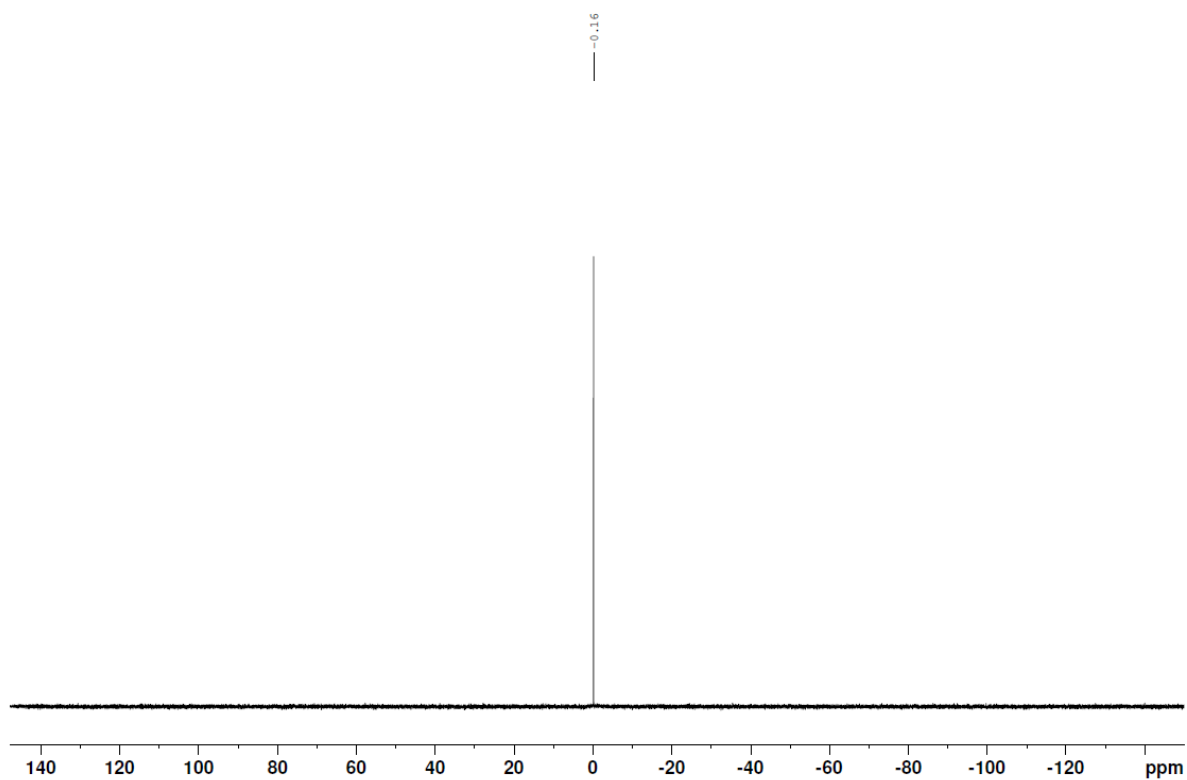

**Fig. S4.** IR spectrum for compound **5** (KBr pellet)

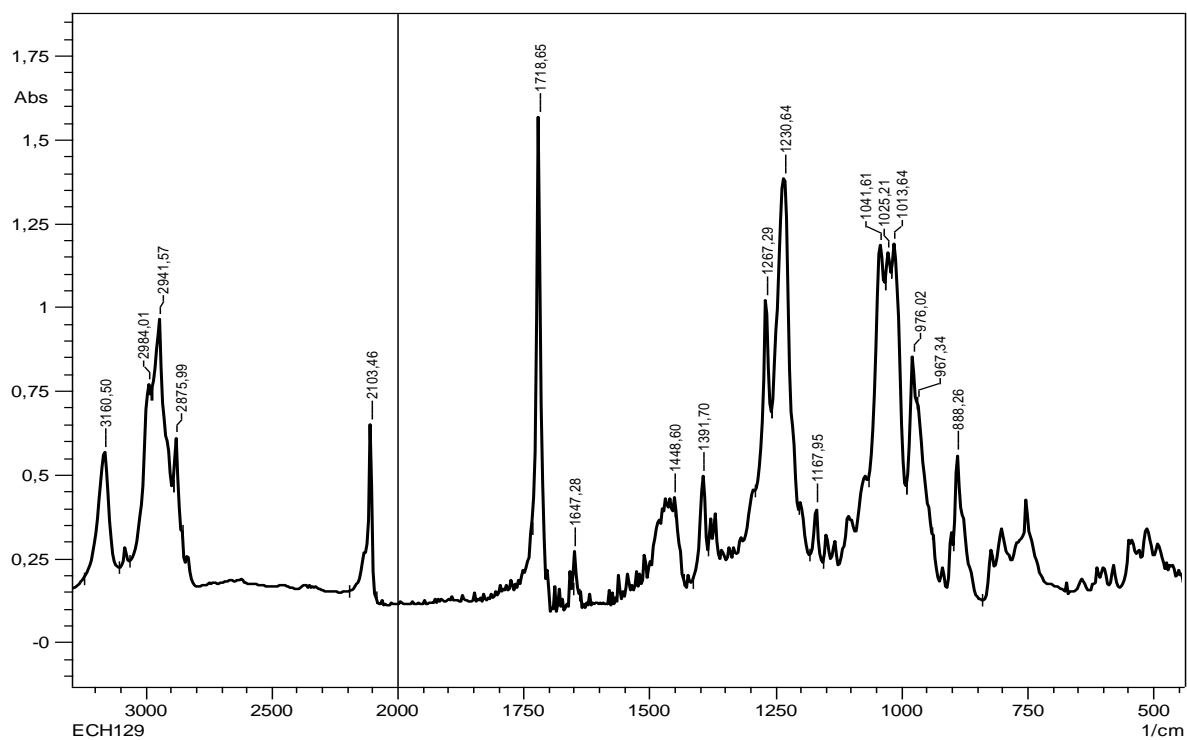

Fig. S5. HR MS, compound 5

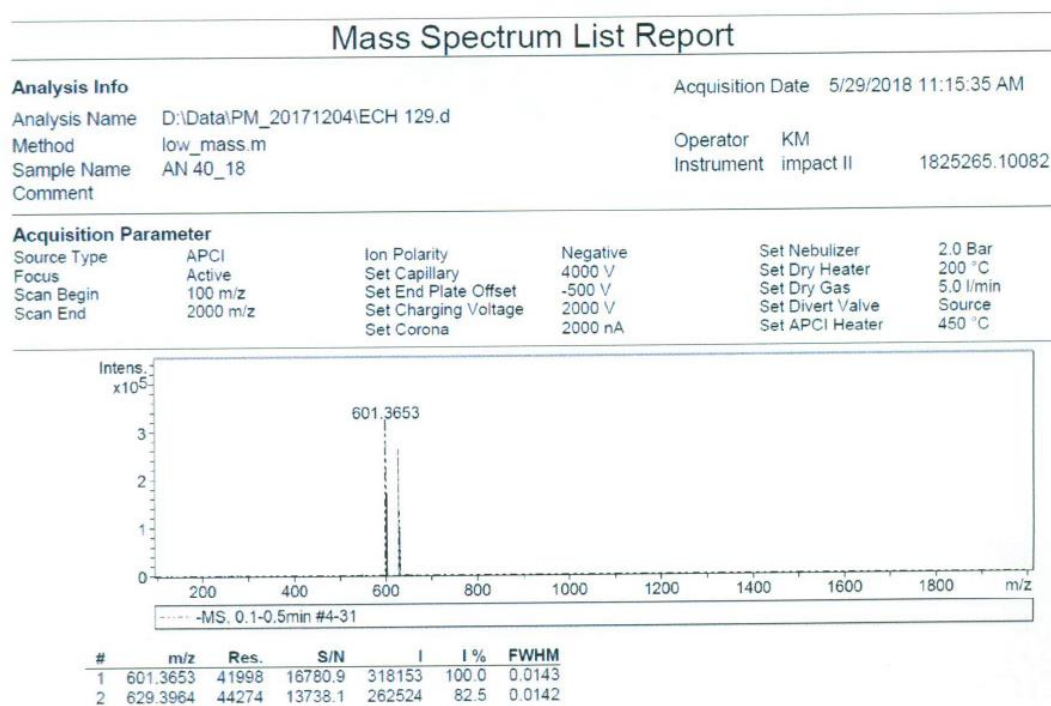

Supplement: molecules-26-00615-s001.pdf [file molecules-26-00615-s001.pdf]
